1 **The *Arabidopsis* Diacylglycerol Kinase 4 is involved in nitric oxide-dependent**  
2 **pollen tube guidance and fertilization**

3

4 Aloysius Wong<sup>1,2</sup>, Lara Donaldson<sup>2,3</sup>, Maria Teresa Portes<sup>4</sup>, Jörg Eppinger<sup>5</sup>, José  
5 Feijó<sup>4,\*</sup> and Christoph Gehring<sup>2,\*</sup>

6 **Affiliations**

7 <sup>1</sup> Department of Biology, College of Science and Technology, Wenzhou-Kean

8 University, 88 Daxue Road, Ou Hai, Wenzhou, Zhejiang Province, 325060, China

9 <sup>2</sup> Division of Biological and Environmental Sciences and Engineering, 4700 King

10 Abdullah University of Science and Technology, Thuwal 23955-6900, Saudi Arabia

11 <sup>3</sup> Department of Molecular and Cell Biology, University of Cape Town, Rondebosch

12 7701, South Africa

13 <sup>4</sup> Department of Cell Biology and Molecular Genetics, University of Maryland, College

14 Park, MD 20742-5815, USA

15 <sup>5</sup> Division of Physical Sciences and Engineering, Biological & Organometallic Catalysis

16 Laboratory, KAUST Catalysis Center, 4700 King Abdullah University of Science and

17 Technology, Thuwal 23955-6900, Saudi Arabia

18

19 \* To whom correspondence should be addressed: [jfeijo@umd.edu](mailto:jfeijo@umd.edu) or

20 [christophandreas.gehring@UniPG.it](mailto:christophandreas.gehring@UniPG.it)

21

## 22 **Summary**

23

24 Nitric oxide (NO) is a key signaling molecule that regulates diverse biological processes  
25 in both animals and plants. In animals, NO regulates vascular wall tone,  
26 neurotransmission and immune response while in plants, NO is essential for  
27 development and responses to biotic and abiotic stresses [1-3]. Interestingly, NO is  
28 involved in the sexual reproduction of both animals and plants mediating physiological  
29 events related to the male gamete [2, 4]. In animals, NO stimulates sperm motility [4]  
30 and binding to the plasma membrane of oocytes [5] while in plants, NO mediates pollen-  
31 stigma interactions and pollen tube guidance [6, 7]. NO generation in pollen tubes (PTs)  
32 has been demonstrated [8] and intracellular responses to NO include cytosolic Ca<sup>2+</sup>  
33 elevation, actin organization, vesicle trafficking and cell wall deposition [7, 9]. However,  
34 the NO-responsive proteins that mediate these responses are still elusive. Here we  
35 show that PTs of *Arabidopsis* lacking the pollen-specific Diacylglycerol Kinase 4 (DGK4)  
36 grow slower and become insensitive to NO-dependent growth inhibition and re-  
37 orientation responses. Recombinant DGK4 protein yields NO-responsive spectral and  
38 catalytic changes *in vitro* which are compatible with a role in NO perception and  
39 signaling in PTs. NO is a fast, diffusible gas and, based on our results, we hypothesize  
40 it could serve in long range signaling and/or rapid cell-cell communication functions  
41 mediated by DGK4 downstream signaling during the progamic phase of angiosperm  
42 reproduction.

43

## 44 Results and Discussion

45

### 46 ***DGK4* is required for NO-dependent PT growth and re-orientation responses and** 47 **affects reproductive fitness**

48 Previously, the pollen-specific *Arabidopsis* Diacylglycerol Kinase 4 (DGK4) (TAIR ID:  
49 At5g57690) has been suggested to harbor a gas-sensing region [2] and DGK activity  
50 has been associated with important roles in pollen germination and growth [10].

51 Therefore, we chose to investigate the NO-dependent PT growth responses in wild-type  
52 (WT) (ecotype *Col-0*) plants and plants lacking DGK4. We characterized a homozygous  
53 *dgk4* plant with a T-DNA insertion 424 bp upstream of the *DGK4* gene (*dgk4-1*;  
54 SALK\_151239) and observed a 50% reduction in *DGK4* expression (Figure S1). *dgk4-1*  
55 PTs grow significantly slower *in vitro* compared to WT across a pH range from 6.5 to 8.5  
56 and in both optimal and reduced Ca<sup>2+</sup> media (Figure 1A). After four hours of  
57 germination, WT PTs reached an average length of 176  $\mu\text{m}$  while *dgk4-1* only reached  
58 144  $\mu\text{m}$  at pH 7.5 ( $n > 100$ ;  $P < 0.05$ ). This mutant line was also reported to have PTs  
59 with altered stiffness and adhesion properties [11]. When exposed to the NO donor  
60 sodium nitroprusside (SNP), both WT and the *dgk4-1* PTs show NO dose-dependent  
61 reduction of growth rates (Figure 1B) much like those reported in other systems like  
62 *Lilium longiflorum*[8] or *Camelia sinensis*[12]. But, importantly, PT growth rate of *dgk4-1*  
63 becomes insensitive to concentration increases over 50 nM SNP, while WT PT growth  
64 rate inhibition continues to decrease in a concentration dependent manner up to 200 nM  
65 SNP (Figures 1B and 1C). This differential sensitivity was also observed for another NO

66 donor, DEA NONOate (Figure 1B). This result shows that PTs of *dgk4-1* are less  
67 responsive to NO thus suggesting a functional link between NO and DGK4. These  
68 phenotypes were confirmed in a second independent homozygous *dgk4* mutant plant  
69 (*dgk4-2*; SALK\_145081, T-DNA insertion 268 bp upstream of the *DGK4* gene) (Figure  
70 S1). PTs of *dgk4-2* display a similar NO insensitivity in terms of growth rate when  
71 compared to WT (Figure S2). We further examined the effect of NO on directional  
72 growth of PTs using *dgk4-1*. When challenged with a NO point source (a SNP-loaded  
73 pipette tip), we observed that both WT and *dgk4-1* PTs showed a negative chemotropic  
74 response, bending away from the NO source much like the observations previously  
75 shown in lily [8]. However, PTs bending angles in WT ( $31.9 \pm 2.4^\circ$ ;  $n = 4$ ) are twice as  
76 sharp than those of *dgk4-1* ( $14.9 \pm 2.5^\circ$ ;  $n = 4$ ) (Figure 1D) revealing a desensitization in  
77 the perception of NO in the *dgk4-1* mutant. Given that the NO critical concentration for  
78 this negative chemotropic reaction response was previously estimated to be in the  
79 range of 5-10 nM [8] this result is consistent with a signaling role for DGK4 in NO  
80 sensing.

81 In accordance with the in vitro germination phenotype, *in vivo* germinated PTs of *dgk4-1*  
82 are likewise growing consistently slower down the pistil than those of WT across all time  
83 points examined (Figures 1E and 1F). Importantly, the slowed PT growth of the mutant  
84 resulted in a significant reproductive fitness bias in favor of WT as observed in the  
85 crossing of emasculated WT flower with pollen from WT and *dgk4-1* that produced  
86 63.5% of WT seeds when screened on MS agar containing 100  $\mu\text{g/mL}$  kanamycin, the

87 selective marker or the *dgk4-1* line used (Figure 1G), a result consistent with results  
88 reported for a different *dgk4* insertion line [11].

89

90 **DGK4 harbors a H-NOX-like center that yields NO-responsive spectral changes**  
91 **and catalytic activity**

92 Through sequence analysis we have previously predicted that DGK4 contains a region  
93 spanning from H350 to R383 similar to heme centers of functional gas-responsive  
94 heme-NO/oxygen (H-NOX), heme-NO binding and NO-sensing families of proteins in  
95 other kingdoms [2]. In particular, this region harbors the HX[12]PX[14,16]YXSXR  
96 consensus pattern derived for heme *b* containing H-NOX centers in proteins from  
97 bacteria and animals and is present in plant orthologs in species such as poplar, castor  
98 bean and soybean but absent in other *Arabidopsis* DGKs (Figure 2A). The presence of  
99 the H-NOX-like signature suggests that DGK4 may accommodate a heme *b* and  
100 correspondingly, the diagnostic spectral properties should have a distinct response to  
101 NO. Recombinant DGK4 yields a Soret peak at 410 nm (Figure 2B), which is distinctly  
102 different from unbound hemin (protohemin IX: Soret band at 435 nm with a shoulder at  
103 400 nm) and falls within the typical peak range observed for proteins with a histidine-  
104 ligated ferric heme *b* [13]. Reduction with sodium dithionite resulted in a red-shift of the  
105 Soret peak to 424 nm accompanied by the emergence of distinct  $\alpha$  (558 nm) and  $\beta$  (526  
106 nm) bands (Figures 2B and S3A). The ferrous state presumably represents the native  
107 state of DGK4 in the cytosol (*A. thaliana* cytosolic redox potential: -310 to -240 mV [14]).  
108 Exposure to air recovers the oxidized Soret peak (410 nm) of DGK4 after 20 min (Figure

109 S3A). Importantly, addition of DEA NONOate attenuates the reduced Soret absorption  
110 (424 nm) in a concentration dependent manner hinting at the possibility of NO  
111 displacing the histidine ligand from the heme group (Figures 2C and S3B). This was  
112 suggested to be an essential step in the signaling of canonical H-NOX proteins [15].  
113 Qualitatively, the observed spectroscopic behavior resembles that of canonical H-NOX  
114 proteins e.g., the H-NOX domain of *S. oneidensis* which showed Soret absorptions at  
115 403 nm (ferric), 430 nm (ferrous) and 399 nm (ferrous, NO-bound) [16]. However, the  
116 frequencies and relative intensities of the observed Soret  $\alpha$  and  $\beta$  peaks are indicative  
117 of a bis-histidine ligated heme *b* center as it is e.g. present in cytochromes *b5* or a  
118 heme-based cis-trans carotene isomerase Z-ISO [17]. In accordance DGK4 mutants  
119 which affect the heme binding site should result in a reduced heme absorption  
120 spectrum, a behavior which was e.g. demonstrated for Z-ISO [17]. According to this  
121 prediction, H350L and Y379L *dgk4* mutants have reduced Soret band intensities of  
122 about 50% and 70% respectively (Figure 2D). Since the Soret bands were still present  
123 in the mutants albeit attenuated, we can expect a similar behavior in their reduction and  
124 NO spectra which we did observe with the H350L mutant protein (Figure S3). Overall,  
125 the H250L *dgk4* mutant recorded a much larger decrease in reduced Soret bands than  
126 that observed with DGK4 WT at low NO donor concentration (0.25 mM DEA NONOate)  
127 while also requiring a slightly longer time ( $\sim$  5 min more than DGK4 WT) to recover its  
128 oxidized Soret peak (410 nm) when exposed to air (Figure S3). Together with a marked  
129 reduced in Soret band intensity of DGK4 with point mutations at the H-NOX-like center,  
130 these results can be interpreted as the weakening of the heme environment.

131 Previously [2] we predicted DGK4 to be a bifunctional catalytic protein with (i) a  
132 canonical kinase domain capable of converting *sn*-1,2-diacylglycerol (DAG) with ATP  
133 into the corresponding phosphatidic acid (PA) and (ii) a moonlighting guanylyl cyclase  
134 (GC) activity that generates cGMP from GTP. Our prediction was recently confirmed by  
135 others [11]. We thus next focused on the catalytic activity of DGK4. NO and cGMP  
136 significantly inhibit DGK4 kinase activity but NO did not affect its GC activity (Figure 2E).  
137 Mutations in the H-NOX center did not affect the kinase activity of DGK4 as both H350L  
138 and Y379L *dgk4* mutants were functional and inhibited by NO to comparable degree as  
139 the WT (Figure S4). Having in mind the changes in the Soret band upon binding on NO  
140 in these mutated lines, this result could be interpreted as implying that NO signaling in  
141 PT chemotropic responses is achieved through alternative pathways. A diverse  
142 interpretation of this result could be offered by considering that (i) while there is a  
143 reduction of intensity and slower recovery upon oxidation, there are still changes in the  
144 Soret band in the mutants, revealing some NO binding and (ii) enzymatic essays *in*  
145 *vitro*, with highly diluted enzyme concentrations and high concentrations of substrate  
146 hardly reproduce the cellular condition where molecular crowding determine specific  
147 kinetic properties [18], and the steady concentrations of NO may be much lower [8].  
148 Our biochemical data also suggest that while the kinase activity of DGK4 seems to be  
149 inhibited by cGMP the GC activity of DGK4 is influenced by NO supporting an  
150 interpretation that the reduced NO response of *dgk4-1* PT is achieved primarily through  
151 a lipid/Ca<sup>2+</sup> signaling pathway rather than through the activation of its GC moonlighting  
152 center as in soluble animal GCs. While consideration of a role for cyclic nucleotides in

153 plant physiology is still affected by controversies regarding their synthesis and  
154 molecular targets, cGMP has been shown to activate Ca<sup>2+</sup> conductivity by the CNGC18  
155 channel localized in tip of PTs [19]. Taken together with the fact that DGK4 has been  
156 shown to localize in the cytosolic region of the PT tube apex [11], our results are  
157 consistent with a signaling role for DGK4 by transducing NO binding into lipid, cGMP,  
158 and Ca<sup>2+</sup> pathways. Since DGKs catalyze the conversion of DAG to PA that is in turn  
159 essential for pollen growth [10] and in particular the mobilization of Ca<sup>2+</sup> [7, 20], our  
160 results could be mechanistically interpreted first assuming that the response of DGK4 to  
161 NO signal alters its kinase activity resulting in lower cytosolic levels of PA and, reduced  
162 cytosolic Ca<sup>2+</sup>. These in turn are known to have various downstream signaling effects,  
163 namely in terms of ROP-GTPase, ion channel activation, resulting in vesicular trafficking  
164 and/or actin dynamics alterations and alteration of PT growth. In agreement with this  
165 interpretation, *dgk4-1* mutant PTs have recently been reported to exhibit altered  
166 mechanical properties with down-regulation of a cyclase associated protein, CAP1  
167 which is involved in actin dynamics in addition to their reduced ability to target the  
168 ovaries *in vivo* [11]. Importantly, slow-down of PT growth has been deemed as  
169 optimizing the perception of chemical cues [21], and constitutes a plausible  
170 interpretation of the loss of chemotropic response in the mutant and likewise the seed-  
171 set reduction observed. As a diffusible gas, NO is well suited to perform fine-tuning of  
172 rapid cell-cell communications such as the pollen-stigma (2, 7). Here we propose DGK1  
173 to be key in understanding the underlying signaling and NO-dependent cellular events  
174 during the progamic phase of sexual plant reproduction.



175

176

## 177 **Experimental Procedures**

178

### 179 **Plant materials and growth conditions**

180 Two mutant Arabidopsis lines (SALK\_151239 and SALK\_145081) with T-DNA  
181 insertions at the promoter of *DGK4* were purchased from Nottingham Arabidopsis Stock  
182 Center (NASC) and progenies were screened for homozygosity using PCR to detect  
183 mutant (T-DNA + *DGK4* reverse primer) and wild-type (*DGK4* promoter forward + *DGK4*  
184 reverse primer) chromosomes (Table S2). The homozygous mutant lines were  
185 subsequently referred to as *dgk4-1* and *dgk4-2* respectively. The T-DNA insertion sites  
186 were confirmed by sequencing (KAUST Bioscience Core Lab, Saudi Arabia). All seeds  
187 were cold stratified at 4 °C for 3 days. *Arabidopsis thaliana* (ecotype *Col-0*) and the T-  
188 DNA mutant lines were sowed on soil (Jiffy, USA) containing 50% (w/v) of vermiculite  
189 and grown in Percival growth chambers (CLF Plant Climatics, Germany) at 22±2 °C  
190 and 60% of relative humidity under long day (16 hours light) photoperiod (100 μM  
191 photons m<sup>-2</sup> s<sup>-1</sup>).

192

### 193 **Characterization of *dgk4* mutant plants**

194 RNA was extracted from pollen from approximately 300 flowers of WT and *dgk4-1*  
195 mutants (Qiagen, USA) and cDNA synthesized using SuperScript III reverse  
196 transcriptase according to manufacturer's instructions (Invitrogen, UK). The cDNA was

197 subjected to semi-quantitative RT-PCR with *DGK4* gene specific primers (Table S2) on  
198 an AB thermal cycler (Bio-Rad, USA) and *DGK4* gene expression was normalized  
199 against that of protein phosphatase 2A subunit A3, *PP2AA3* (At1g13320) (Table S2)  
200 using the ImageLab software (Bio-Rad, USA).

201

### 202 ***In vitro* pollen germination**

203 *In vitro* pollen germination was performed as detailed previously [7, 8] in the absence or  
204 presence of NO provided by either SNP or DEA NONOate. In PT re-orientation  
205 experiments, pollen was allowed to germinate for 2 hours before image acquisition at  
206 specified intervals. The growth of at least 100 PTs were measured on a Nikon Eclipse  
207 TE2000-S inverted microscope equipped with an Andor iXon3 camera across a range of  
208 pH (pH 6.5 to 8.5) and in optimal (5 mM) and low (100  $\mu$ M)  $Ca^{2+}$  media. In NO-treated  
209 pollen germination and PT growth experiments, at least 150 unique pollen/PTs were  
210 considered. Image frames covering the entire growth area of the culture dish that is  
211 mounted on automated stage, were acquired using the Nikon Eclipse TE2000-S  
212 inverted microscope which is equipped with a Hamamatsu Flash28s CMOS camera.  
213 The PT lengths were measured using NeuronJ [22]. In PT re-orientation studies, PTs  
214 were challenged with a NO probe provided by a glass pipette tip with a  $\sim 5 \mu$ m aperture  
215 that was pre-filled with 10 mM SNP-agarose (1%) and placed 60  $\mu$ m away from the  
216 growing PT tip using micromanipulators with a stepper-motor-driven three-dimensional  
217 positioner. The growth and bending response of four randomly selected healthy growing  
218 PTs were monitored by real-time imaging using a Nikon Eclipse TE300 inverted

219 microscope equipped with an Andor iXon3 camera and the bending angles measured  
220 using ImageJ [23].

221

### 222 **Reproductive fitness test**

223 The reproductive fitness of *dgk4-1* was examined by crossing emasculated WT  
224 (ecotype *Col-0*) flowers with pollen from both WT and *dgk4-1*. The desiccated seeds  
225 were collected, surface sterilized and stored at 4 °C for 3 days before growing on MS  
226 agar (1.1% w/v) containing 100 µg/mL kanamycin (Sigma-Aldrich, St. Louis, MO). The  
227 proportion of WT to *dgk4-1* seeds were scored after 7 days of growth.

228

### 229 **UV-visible absorption spectroscopy**

230 The UV-visible spectra of affinity purified recombinant DGK4 (200 µg/mL) was recorded  
231 on a PHERAstar FS micro-plate reader (BMG Labtech, USA). The heme environment of  
232 DGK4 was characterized by the addition of a reducing agent, sodium dithionite  
233 ( $\text{Na}_2\text{S}_2\text{O}_4$ ) to a final concentration of 10 mM and absorbance was immediately  
234 measured and examined for spectral changes. The protein sample was then exposed to  
235 air and any recovery of the oxidized peak was monitored by the same spectra  
236 measurements at 5 min intervals. The heme-NO complex was generated by  
237 immediately adding the NO donor DEA NONOate to a pre-reduced recombinant DGK4  
238 before making the same spectral measurements.

239

### 240 **DAG kinase and GC assays**

241 DAG kinase assay and phospholipid extraction was performed using 30  $\mu\text{g}$  purified  
242 recombinant protein in a reaction mixture containing 40 mM Bis-Tris (pH 7.5), 5 mM  
243  $\text{MgCl}_2$ , 0.1 mM EDTA, 1 mM spermine, 0.5 mM dithiothreitol, 1 mM sodium  
244 deoxycholate, 0.02% (v/v) Triton X-100, 500  $\mu\text{M}$  1,2-DOG and 1 mM ATP, in the  
245 absence or presence of 1 mM SNP or 0.65 mM DEA NONOate. PA generated from the  
246 reactions was measured using the Total Phosphatidic Acid Assay kit according to the  
247 manufacturer's instructions (Cayman Chemical, Michigan USA).

248 GC assay was performed using 10  $\mu\text{g}$  purified recombinant protein in a reaction mixture  
249 containing 50 mM Tris-HCl (pH 7.5), 1 mM GTP, 5 mM  $\text{MgCl}_2$  or  $\text{MnCl}_2$ , in the absence  
250 or presence of 1 mM SNP or 0.65 mM DEA NONOate. cGMP generated from the  
251 reactions was measured using the cGMP enzyme immunoassay (EIA) Biotrak System  
252 with the acetylation protocol according to the manufacturer's instructions (GE  
253 Healthcare, Illinois USA).

254

### 255 **Chemicals and statistical analysis**

256 All chemicals were purchased from Sigma unless stated otherwise. Statistical analysis  
257 was performed using Student's *t*-test with Microsoft Excel 2010. Significance was set to  
258 a threshold of  $P < 0.05$  and *n* values represent number of biological replicates.

259

260 PT growth *in planta* and protein expression and purification are described in detail in  
261 Supplemental Experimental Procedures.

262 **Supplemental Information**

263 Supplemental Information contains four figures, two tables, supplemental experimental  
264 procedures and supplemental references.

265

266 **Competing Interests**

267 The authors declare no competing interest.

268

269 **Author Contributions**

270 C.G. conceived of the project and A.W., L.D. and M.T.P. conducted the experiments. All  
271 authors contributed to the data analyses and writing of the manuscript.

272

273 **Acknowledgments**

274 This research was supported by the King Abdullah University of Science and  
275 Technology (CG lab) and National Science Foundation grants MCB-1616437 and  
276 1714993 (JF lab). A.W. is supported by the National Natural Science Foundation of  
277 China (Grant no. 31850410470) and the Zhejiang Provincial Natural Science  
278 Foundation of China (Grant no. LQ19C130001).

279

280 **References**

- 281 1. Wendehenne, D., Pugin, A., Klessig, D.F., and Durner, J. (2001). Nitric oxide:  
282 comparative synthesis and signaling in animal and plant cells. *Trends Plant Sci.*  
283 *6*, 177-183.

- 284 2. Domingos, P., Prado, A.M., Wong, A., Gehring, C., and Feijo, J.A. (2015). Nitric  
285 oxide: a multitasked signaling gas in plants. *Mol. Plant* **8**, 506-520.
- 286 3. Astier, J., Mounier, A., Santolini, J., Jeandroz, S., and Wendehenne, D. (2019).  
287 The evolution of nitric oxide signalling diverges between the animal and the  
288 green lineages. *J. Exp. Bot.* *erz088*, doi: 10.1093/jxb/erz088.
- 289 4. Miraglia, E. De Angelis, F., Gazzano, E., Hassanpour, H., Bertagna, A., Aldieri,  
290 E., Revelli, A., and Ghigo, D. (2011). Nitric oxide stimulates human sperm motility  
291 via activation of the cyclic GMP/protein kinase G signaling pathway.  
292 *Reproduction* **141**, 47-54.
- 293 5. Sengoku, K., Kenichi, T., Toshiaki, Y., Yasuo, T., Toshinobu, M., and Mutsuo, I.  
294 (1998). Effects of low concentrations of nitric oxide on the zona pellucida binding  
295 ability of human spermatozoa. *Fertil. Steril.* **69**, 522-527.
- 296 6. McInnis, S.M., Desikan, R., Hancock, J.T., and Hiscock, S.J. (2006). Production  
297 of reactive oxygen species and reactive nitrogen species by angiosperm  
298 stigmas and pollen: potential signalling crosstalk? *New Phytol.* **172**, 221-228.
- 299 7. Prado, A.M., Colaco, R., Moreno, N., Silva, A.C., and Feijo, J.A. (2008).  
300 Targeting of pollen tubes to ovules is dependent on nitric oxide (NO) signaling.  
301 *Mol. Plant* **1**, 703-714.
- 302 8. Prado, A.M., Porterfield, D.M., and Feijo, J.A. (2004). Nitric oxide is involved in  
303 growth regulation and re-orientation of pollen tubes. *Development* **131**, 2707-  
304 2714.

- 305 9. Wang, Y., Chen, T., Zhang, C., Hao, H., Liu, P., Zheng, M., Baluška, F., Šamaj,  
306 J., and Lin, J. (2009). Nitric oxide modulates the influx of extracellular Ca<sup>2+</sup> and  
307 actin filament organization during cell wall construction in *Pinus bungeana* pollen  
308 tubes. *New Phytol.* *182*, 851-862.
- 309 10. Potocky, M., Pleskot, R., Pejchar, P., Vitale, N., Kost, B., and Žárský, V. (2014).  
310 Live-cell imaging of phosphatidic acid dynamics in pollen tubes visualized by  
311 Spo20p-derived biosensor. *New Phytol.* *203*, 483-494.
- 312 11. Dias, F.V. Serrazina, S., Vitorino, M., Marchese, D., Heilmann, I., Godinho, M.,  
313 Rodrigues, M., and Malhó, R. (2019). A role for diacylglycerol kinase 4 in  
314 signalling crosstalk during *Arabidopsis* pollen tube growth. *New Phytol.* doi:  
315 10.1111/nph.15674.
- 316 12. Wang, Y.H., Li, X.C., Zhu-Ge, Q., Jiang, X., Wang, W.D., Fang, W.P., Chen, X.,  
317 and Li, X.H. (2012). Nitric oxide participates in cold-inhibited *Camellia sinensis*  
318 pollen germination and tube growth partly via cGMP in vitro. *PLoS One* *7*,  
319 e52436, doi: 10.1371/journal.pone.0052436.
- 320 13. Walker, F.A., Ribeiro, J.M., and Montfort, W.R. (1999). Novel nitric oxide-  
321 liberating heme proteins from the saliva of bloodsucking insects. *Met. Ions Biol.*  
322 *Syst.* *36*, 621-663.
- 323 14. Aller, I., Rouhier, N., and Meyer, A.J. (2013). Development of roGFP2-derived  
324 redox probes for measurement of the glutathione redox potential in the cytosol of  
325 severely glutathione-deficient *rml1* seedlings. *Front. Plant Sci.* *4*, 506.

- 326 15. Russwurm, M., and Koesling, D. (2004). NO activation of guanylyl cyclase.  
327 EMBO J. *23*, 4443-4450.
- 328 16. Dai, Z., Farquhar, E.R., Arora, D.P., and Boon, E.M. (2012). Is histidine  
329 dissociation a critical component of the NO/H-NOX signaling mechanism?  
330 Insights from X-ray absorption spectroscopy. Dalton Trans. *41*, 7984-7993.
- 331 17. Beltran, J., Kloss, B., Hosler, J.P., Geng, J., Liu, A., Modi, A., Dawson, J.H.,  
332 Sono, M., Shumskaya, M., Ampomah-Dwamena, C., et al. (2015). Control of  
333 carotenoid biosynthesis through a heme-based cis-trans isomerase. Nat. Chem.  
334 Biol. *11*, 598-605.
- 335 18. Mourão M.A., Hakim, J.B., and Schnell, S. (2014). Connecting the dots: the  
336 effects of macromolecular crowding on cell physiology. Biophys. J. *107*, 2761-  
337 2766.
- 338 19. Gao, Q.F., Gu, L.L., Wang, H.Q., Fei, C.F., Fang, X., Hussain, J., Sun, S.J, Dong  
339 J.Y., Liu, H., and Wang, Y.F. (2016). Cyclic nucleotide-gated channel 18 is an  
340 essential Ca<sup>2+</sup> channel in pollen tube tips for pollen tube guidance to ovules in  
341 Arabidopsis. Proc. Natl. Acad. Sci. U. S. A. *113*, 3096-3101.
- 342 20. Monteiro, D., Liu, Q., Lisboa, S., Scherer, G.E.F., Quader, H., and Malhó, R.  
343 (2005). Phosphoinositides and phosphatidic acid regulate pollen tube growth and  
344 reorientation through modulation of [Ca<sup>2+</sup>]<sub>c</sub> and membrane secretion. J. Exp. Bot.  
345 *56*, 1665-1674.
- 346 21. Stewman, S.F., Jones-Rhoades, M., Bhimalapuram, P., Tchernookov, M.,  
347 Preuss, D., and Dinner, A.R. (2010). Mechanistic insights from a quantitative



- 348 analysis of pollen tube guidance. *BMC Plant Biol.* *10*, 32, doi: 10.1186/1471-  
349 2229-10-32.
- 350 22. Meijering, E., Jacob, M., Sarria, J.C., Steiner, P., Hirling, H., and Unser, M.  
351 (2004). Design and validation of a tool for neurite tracing and analysis in  
352 fluorescence microscopy images. *Cytometry A* *58*, 167-176.
- 353 23. Schneider, C.A., Rasband, W.S., and Eliceiri, K.W. (2012). NIH Image to ImageJ:  
354 25 years of image analysis. *Nat. Meth.* *9*, 671-675.
- 355
- 356

357 **Figure 1:**

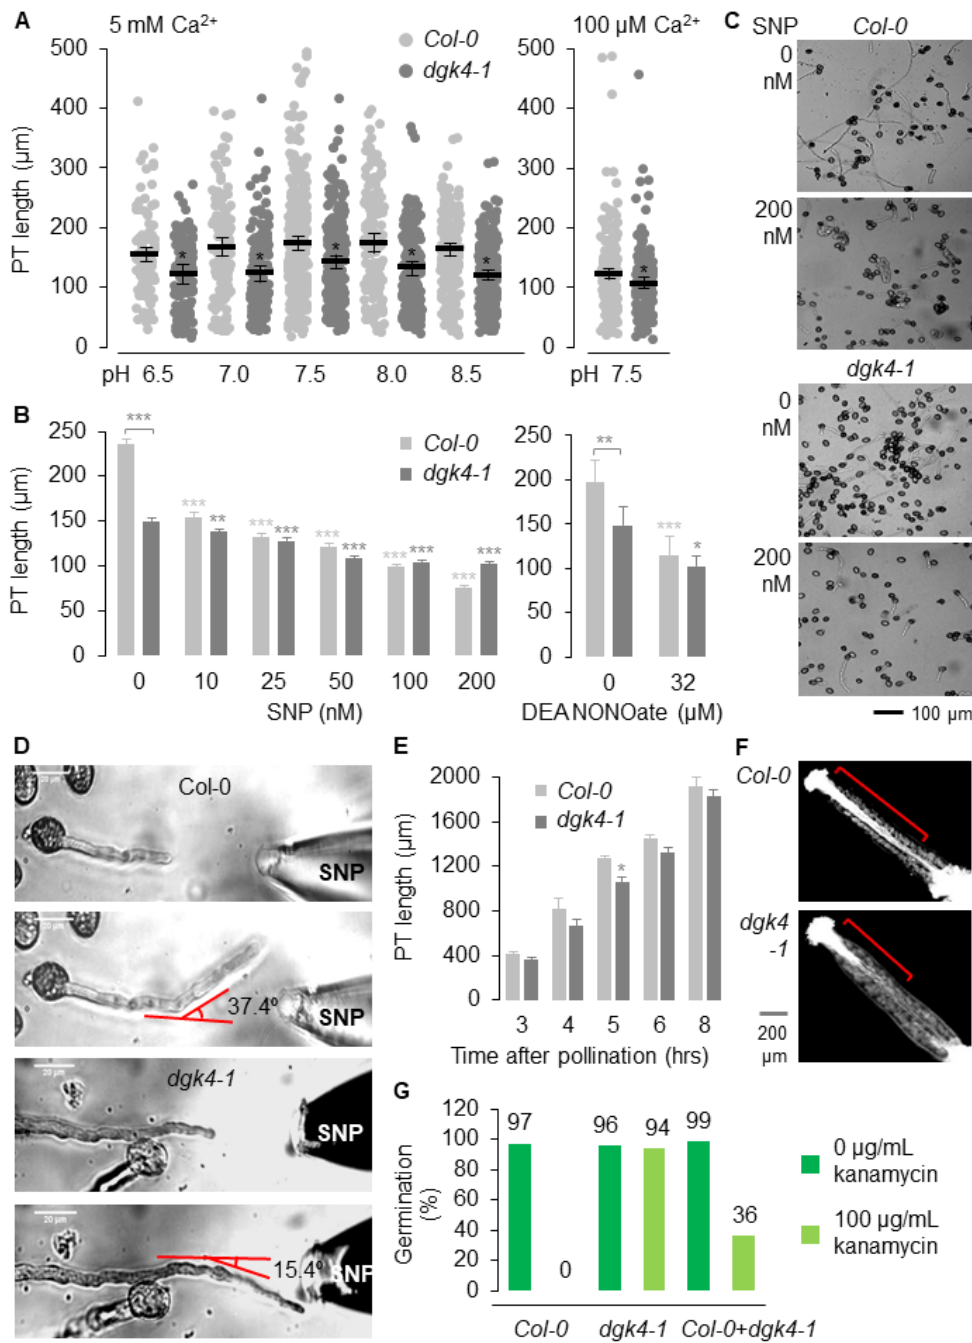

358

359

360 **Figure 1. *dgk4-1* PT has reduced growth rate and NO-dependent PT growth**

361 **responses**

362 (A) The growth of *dgk4-1* PT is slower than that of *Col-0* consistent across a range of  
363 pH (6.5 to 8.5) and in both optimal (5 mM) (left) and reduced (100  $\mu$ M)  $Ca^{2+}$  (right)  
364 media. Error bars represent standard error of the mean ( $n > 100$ ).  $* = P < 0.05$   
365 compared to PT length of *Col-0*. (B) NO-dependent inhibition of *dgk4-1* PT growth is  
366 reduced compared to that of *Col-0*. NO was provided by either SNP or DEA NONOate.  
367 (C) Representative images of *dgk4-1* and *Col-0* PTs with and without NO (provided by  
368 200 nM SNP). *In vitro* pollen germination was performed as detailed previously [7, 8]  
369 and PT length was analyzed by capturing images covering the entire growth area of the  
370 culture dish that was mounted on an automated stage using the Nikon Eclipse TE2000-  
371 S inverted microscope equipped with a Hamamatsu Flash28s CMOS camera. PT  
372 lengths were then measured using NeuronJ [22]. Error bars represent standard error of  
373 the mean ( $n > 150$ ).  $* = P < 0.05$ ,  $** = P < 0.005$  and  $*** = P < 0.0005$  compared to PT  
374 length of untreated sample. (D) A representative image of the response of a growing  
375 *Col-0* PT bending away from a NO glass probe containing 1% agarose-SNP (10 mM) at  
376 a sharper angle than *dgk4-1*. The PT NO-dependent re-orientation response was  
377 monitored ( $n = 4$ ) by real-time imaging using a Nikon Eclipse TE300 inverted  
378 microscope equipped with an Andor iXon3 camera and the bending angles measured  
379 using ImageJ [23]. (E) In the pistil, PT growth of *dgk4-1* is slowed. (F) The  
380 representative pistil image at 5 hours post-fertilization shows a higher density of longer  
381 *Col-0* PTs. Error bars represent standard error of the mean ( $n > 3$ ).  $* = P < 0.05$   
382 compared to tube length of *Col-0*. (G) *dgk4-1* PT showed reduced reproductive fitness  
383 when allowed to compete with the pollen of *Col-0* on emasculated *Col-0* flowers for

384 fertilization. '*Col-0*' and '*dgk4-1*' represent seeds produced from self-fertilized *Col-0* and  
385 *dgk4-1* plants, and '*Col-0 + dgk4-1*' represents seeds produced from emasculated *Col-0*  
386 flower crossed with *Col-0* and *dgk4-1* pollen. The seeds from the cross ( $n > 70$ )  
387 screened on MS agar (1.1% w/v) containing 100  $\mu\text{g/mL}$  of kanamycin, showed greater  
388 proportion (63.5%) of *Col-0* genotype.

389

390

391 **Figure 2:**

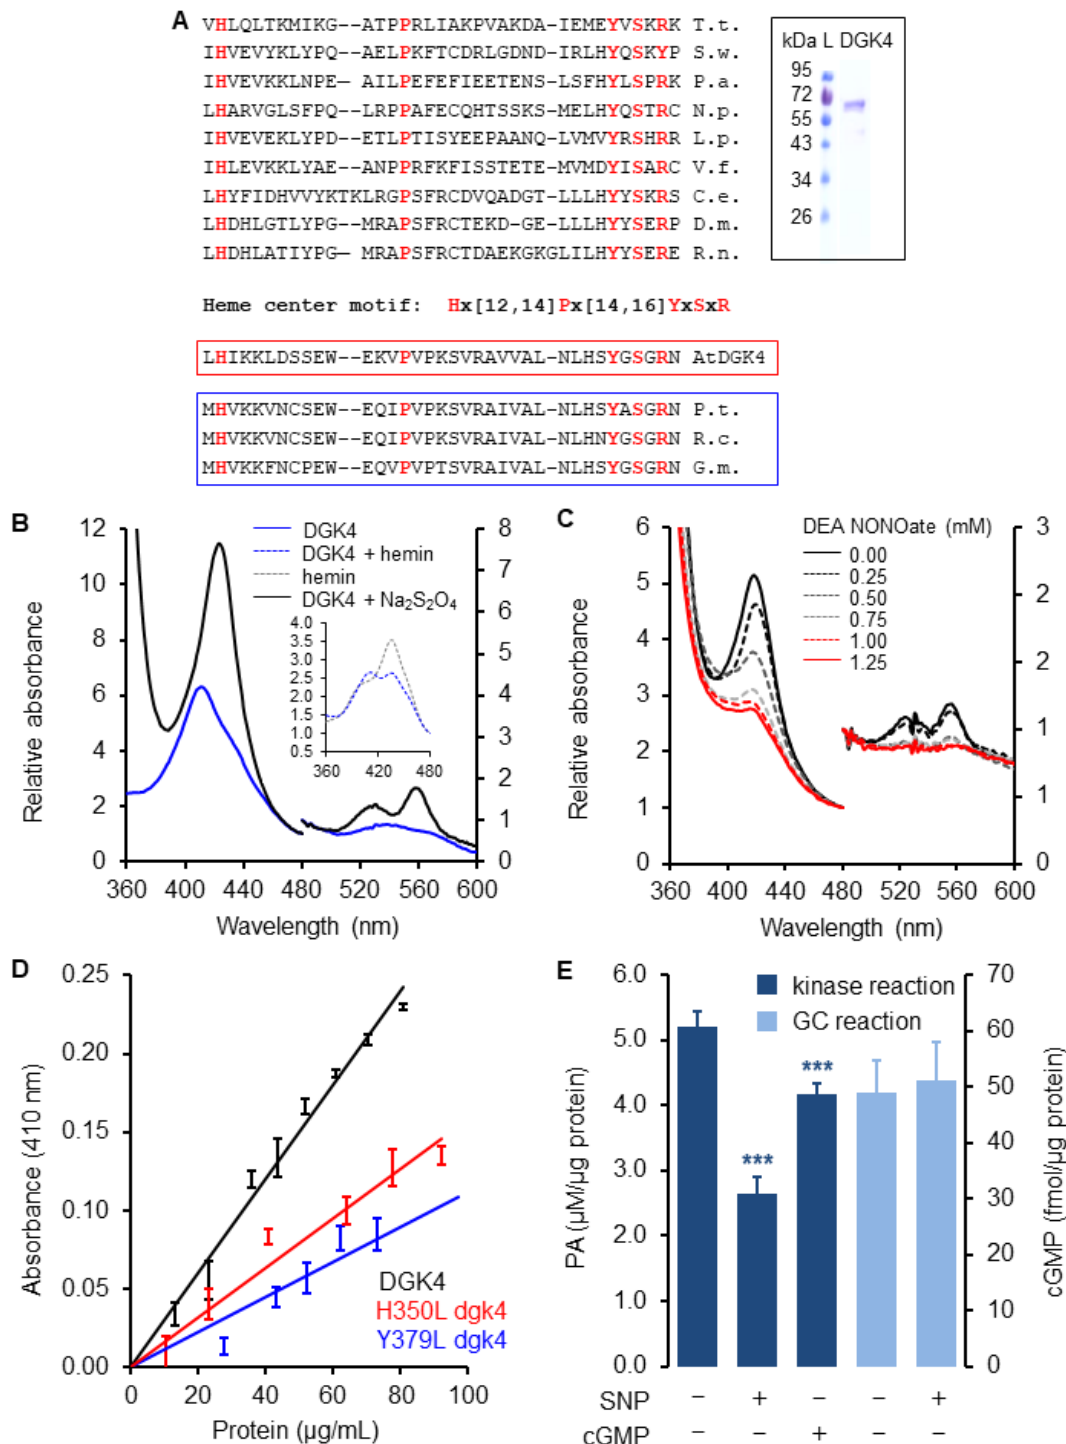

392

393 **Figure 2. DGK4 harbors a H-NOX-like center and has NO-responsive spectral and**  
 394 **catalytic activity**

395 **(A)** The region H350 – R383 in DGK4 contains amino acid residues of annotated heme  
396 centers of gas-responsive proteins as shown in the alignment of *Thermoanaerobacter*  
397 *tengcongensis* (T.t.; GI: 3566245696), *Shewanella woodyi* (S.w.; GI: 169812443),  
398 *Pseudoalteromonas atlantica* (P.a.; GI: 109700134), *Nostoc punctiforme* (N.p.; GI:  
399 126031328), *Legionella pneumophila* (L.p.; GI: 52841290), *Vibrio fischeri* (V.f.; GI:  
400 59713254), *Caenorhabditis elegans* (C.e.; GI: 52782806), *Drosophila melanogaster*  
401 (D.m.; GI: 861203), *Rattus norvegicus* (R.n.; GI:27127318), *Homo sapiens* (H.s.; GI:  
402 2746083), *Arabidopsis thaliana* (A.t.; GI: 145359366), *Populus trichocarpa* (P.t.; GI:  
403 224143809), *Ricinus communis* (R.c.; GI: 255581896) and *Glycine max* (G.m.; GI:  
404 356567686) hemoproteins. The conserved functionally assigned residues of the heme  
405 centers are highlighted in red. Red box represents heme center of DGK4 and blue box  
406 represents orthologs of DGK4 that also contain similar heme centers. Inset:  
407 Recombinant DGK4 was generated and purified according to methods in Supplemental  
408 Experimental Procedures. **(B)** DGK4 (inset) contains a cytochrome *b<sub>5</sub>* type heme center  
409 as indicated by the electronic absorption spectra in the ferric and ferrous state (Table  
410 S1). **(C)** UV-vis characterization of recombinant DGK4 reveals that NO attenuates the  
411 Soret peak of the ferrous heme center in a concentration dependent manner. **(D)** The  
412 H350L and Y379L dgk4 mutants have reduced heme binding. At 80 µg of protein,  
413 H350L and Y379L dgk4 have Soret peaks that are 0.5- and 0.3-fold of DGK4 (*n* = 3).  
414 **(E)**, The kinase activity of DGK4 was reduced in the presence of SNP (1 mM) or cGMP  
415 (1 mM) but its GC activity was unaffected by SNP (1 mM). Kinase reaction mixture  
416 contains 40 mM Bis-Tris (pH 7.5), 5 mM MgCl<sub>2</sub>, 0.1 mM EDTA, 1 mM spermine, 0.5 mM

417 dithiothreitol, 1 mM sodium deoxycholate, 0.02% (v/v) Triton X-100, 500  $\mu$ M 1,2-DOG  
418 and 1 mM ATP and GC reaction mixture contains 50 mM Tris-HCl (pH 7.5), 1 mM GTP,  
419 5 mM MgCl<sub>2</sub> or MnCl<sub>2</sub> (see Experimental Procedures for details). Dark blue bars  
420 represent kinase reactions while light blue bars represent GC reactions ( $n = 3$ ). \*\*\* =  $P <$   
421 0.0005 compared to activity of DGK4 in the absence of SNP or cGMP.  
422
