# Supplementary material for: The Arabidopsis Diacylglycerol Kinase 4 is involved in nitric oxide-dependent pollen tube guidance and fertilization
Source: bioRxiv or medRxiv preprint supplement (doi:10.1101/665810), 2019-06-09
Supplement: Supplementary file [file media-1.pdf]

1 **Supplemental Information**

2

3 **Figure S1**

4 Characterization of *dgk4* T-DNA insertion mutant plants

5 **Figure S2**

6 Homozygous *dgk4-2* PT has slower growth rate and reduced NO-dependent growth  
7 response

8 **Figure S3**

9 DGK4 harboring point mutation at the H-NOX-like center yields spectral behavior similar  
10 to WT

11 **Figure S4**

12 Kinase activities of DGK4 and mutant *dgk4* harboring point mutations at the H-NOX-like  
13 center were inhibited by NO

14 **Table S1**

15 UV-Vis spectroscopic data of selected heme proteins

16 **Table S2**

17 Primers for cloning of *DGK4* and characterization of *dgk4-1* and *dgk4-2* plants

18 **Movie S1**

19 PT re-orientation responses of *Col-0* and *dgk4-1* to NO

20

21 **Supplemental Experimental Procedures**

22

23 **Supplemental References**

24 **Figure S1. Characterization of *dgk4* T-DNA insertion mutant plants**

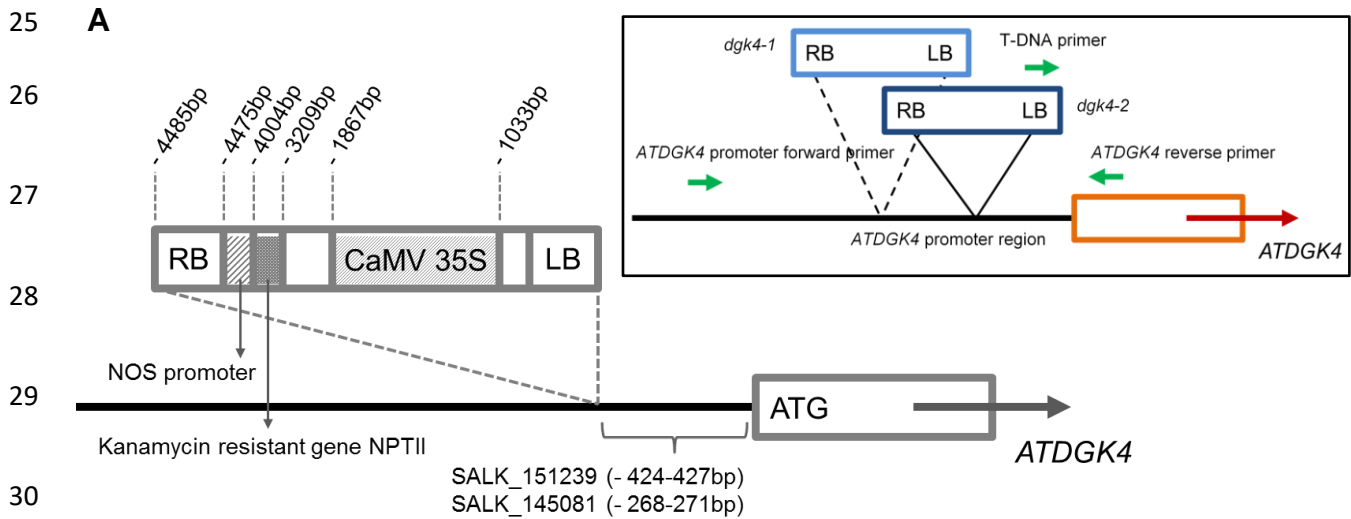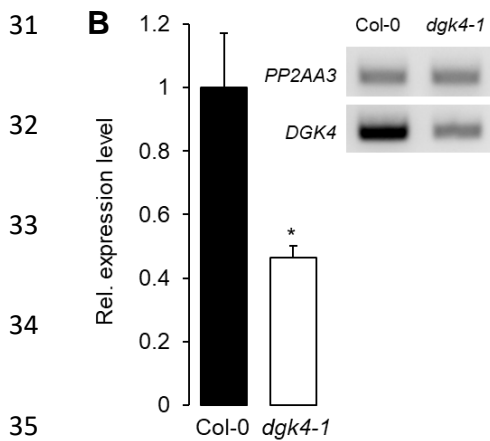

Legend:

SALK\_151239 is designated as *dgk4-1*

SALK\_145081 is designated as *dgk4-2*

36 **(A)** Schematic view of T-DNA insertion sites of *dgk4* mutants. Location and content of  
 37 SALK T-DNA insertions are labelled. LB and RB indicate Left Border and Right Border  
 38 of the T-DNA respectively. Inset: Green arrows indicate the position and direction of  
 39 primers (see also Table S2) used in RT-PCR to determine *DGK4* expression levels. **(B)**  
 40 *dgk4-1* pollen has reduced *DGK4* mRNA levels as estimated by semi-quantitative RT-  
 41 PCR. \* =  $P < 0.05$  compared to *DGK4* mRNA levels of *Col-0* pollen and gel pictures are  
 42 representative of three independently derived biological replicates.

43 **Figure S2. Homozygous *dgk4-2* PT has slower growth rate and reduced NO-**  
44 **dependent growth response**

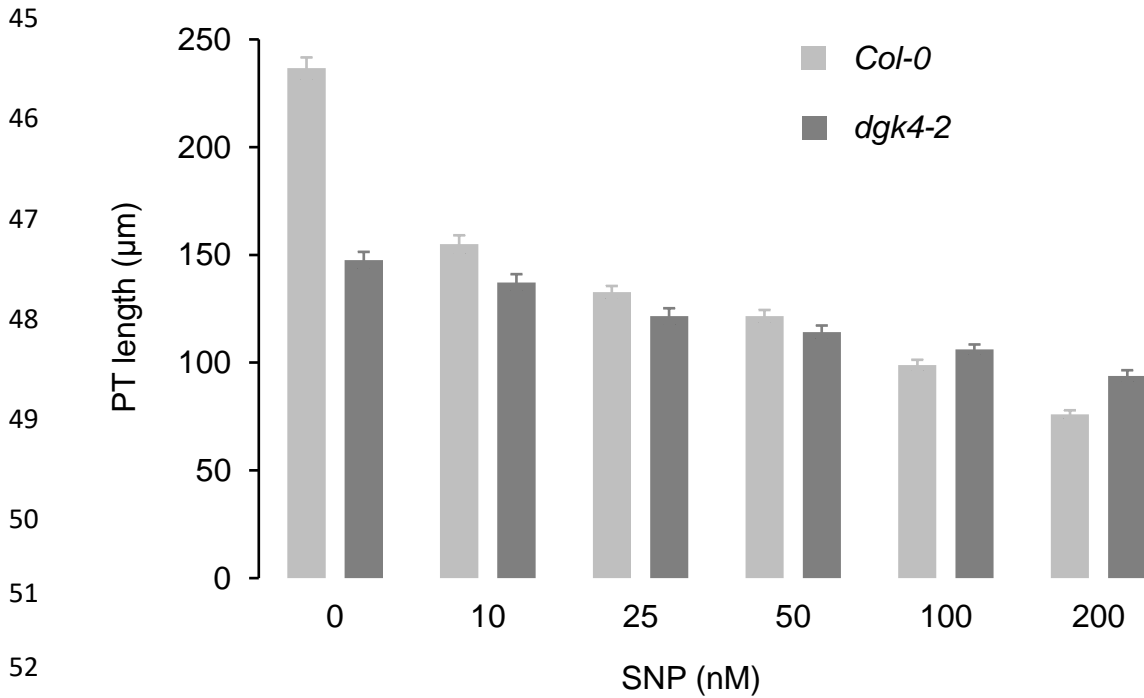

54 NO-dependent inhibition of *dgk4-2* PT growth is reduced compared to that of *Col-0*. NO  
55 was provided by either SNP. *In vitro* pollen germination was performed as detailed  
56 previously [1, 2] and PT length was analyzed by capturing images covering the entire  
57 growth area of the culture dish that is mounted on an automated stage using the Nikon  
58 Eclipse TE2000-S inverted microscope equipped with a Hamamatsu Flash28s CMOS  
59 camera. The pollen tube lengths were then measured using NeuronJ [3]. Error bars  
60 represent standard error of the mean ( $n > 150$ ).

61  
62  
63

64 **Figure S3. DGK4 harboring point mutation at the H-NOX-like center yields spectral**  
 65 **behavior similar to WT**

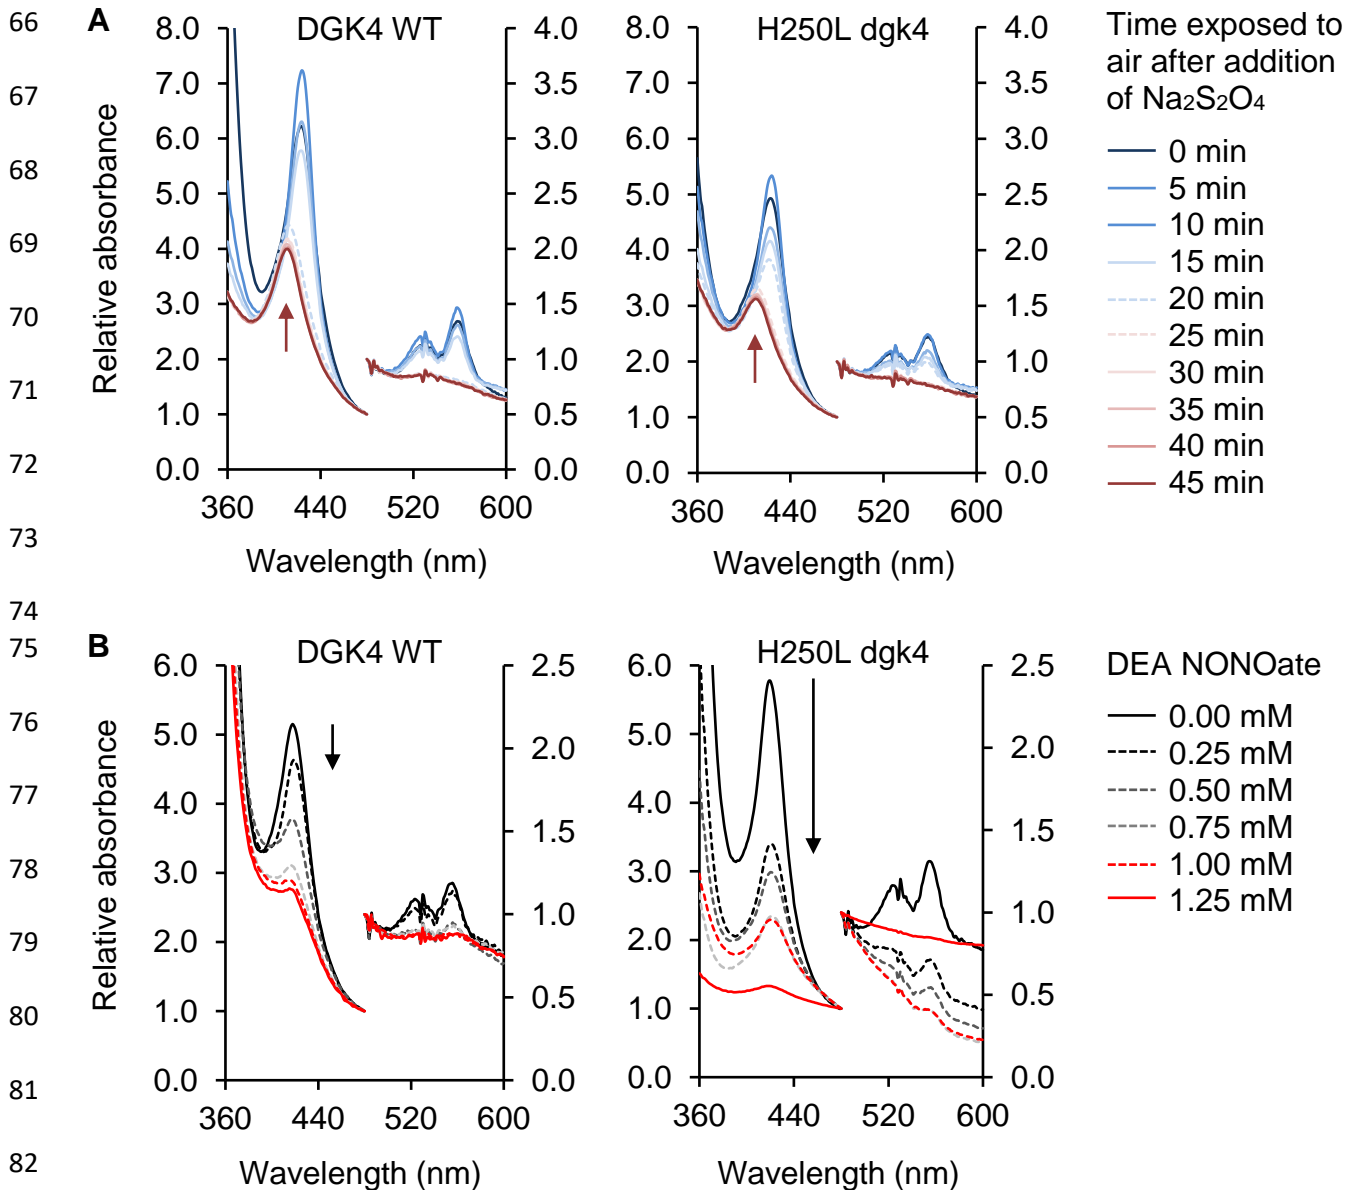

84 **(A)** UV-vis characterization reveals that the Soret peaks (410 nm) of 80  $\mu\text{g}$  DGK4 WT and  
 85 H250L dgk4 mutant proteins were both red-shifted to 424 nm accompanied by the  
 86 emergence of distinct  $\alpha$  (558 nm) and  $\beta$  (526 nm) bands when reduced with sodium  
 87 dithionite. The oxidized Soret peaks (410 nm) (red arrows) of both DGK4 WT and H250L

88 dgk4 mutant were fully recovered after 20 and 25 min of exposure to air respectively. **(B)**  
89 Addition of DEA NONOate to reduced DGK4 and H250L dgk4 attenuates the Soret  
90 absorption (424 nm) in a concentration dependent manner where the Soret,  $\beta$ - and  $\alpha$ -  
91 peaks vanish with increasing concentration of the NO donor. H250L dgk4 mutant  
92 recorded a much larger decrease in reduced Soret bands than that observed with DGK4  
93 WT at low NO donor concentration (0.25 mM DEA NONOate) (black arrows) while also  
94 requiring a slightly longer time (~ 5 min more than DGK4 WT) (red arrows) to recover its  
95 oxidized Soret peak (410 nm) when exposed to air.

96

97

98

99

100

101

102

103

104

105

106

107

108

109

110

111 **Figure S4. Kinase activities of DGK4 and mutant dgk4 harboring point mutations**  
112 **at the H-NOX-like center were inhibited by NO**

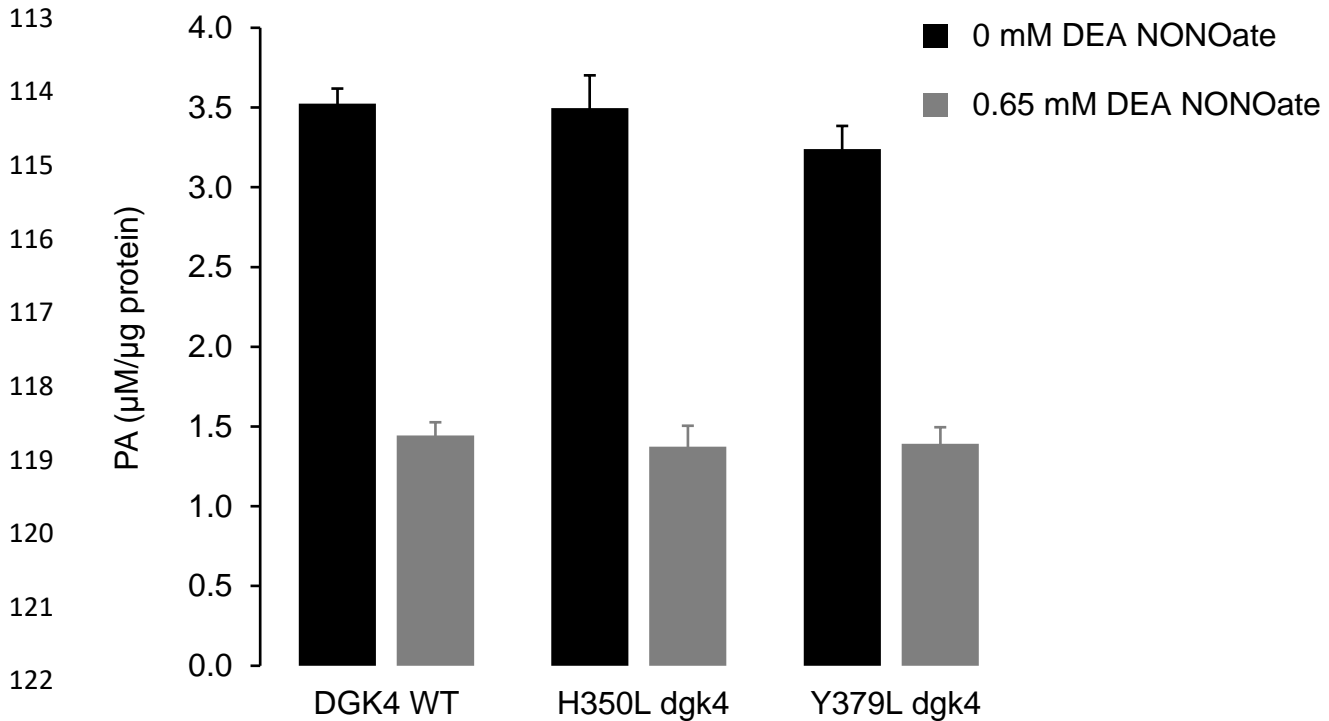

124 The kinase activities of dgk4 mutants H350L and Y379L were unaffected by the point  
125 mutations at the H-NOX-like center and were inhibited by NO to comparable degree as  
126 the WT. Kinase assay was done in reaction mixtures containing 40 mM Bis-Tris (pH  
127 7.5), 5 mM  $\text{MgCl}_2$ , 0.1 mM EDTA, 1 mM spermine, 0.5 mM dithiothreitol, 1 mM sodium  
128 deoxycholate, 0.02% (v/v) Triton X-100, 500  $\mu\text{M}$  1,2-DOG and 1 mM ATP, with or  
129 without 0.65 mM DEA NONOate (see Experimental Procedures for details). Black solid  
130 bars represent kinase reactions performed in the absence of NO while grey solid bars  
131 represent kinase reactions performed in the presence of NO ( $n = 6$ ).

132

133

134 **Table S1. UV-Vis spectroscopic data of selected heme proteins**

| Protein ( <i>sp.</i> ) | Soret / $\beta$ / $\alpha$ ; max. absorption / nm |                            |                 | Source    |
|------------------------|---------------------------------------------------|----------------------------|-----------------|-----------|
|                        | ferric                                            | ferrous                    | ferrous-NO      |           |
| DGK4 ( <i>At</i> )     | 410 / $\alpha + \beta$ 534                        | 424 / 526 / 558            | 418 / - / -     | This work |
| H-NOX ( <i>So</i> )    | 403 / - / -                                       | 430 / $\alpha + \beta$ 560 | 399 / 543 / 572 | [4]       |
| Cyt b5 ( <i>Gl</i> )   | 411 / $\alpha + \beta$ 532                        | 423 / 526 / 558            |                 | [5]       |
| Z-ISO ( <i>At</i> )    | 414 / $\alpha + \beta$ 531                        | 414 / 529 / 559            |                 | [6]       |

135 Legend: *At*: *Arabidopsis thaliana*, *So*: *Shewanella oneidensis*, *Gl*: *Giardia lamblia*.

136

137

138

139

140

141

142

143

144

145

146

147

148

149

150

151 **Table S2. Primers for cloning of *DGK4* and characterization of *dgk4-1* and *dgk4-2***  
 152 **plants**

| <b>Primer name</b>                            | <b>Sequence (5' – 3')</b>             |
|-----------------------------------------------|---------------------------------------|
| <b><i>DGK4</i> cloning</b>                    |                                       |
| <i>DGK4</i> F                                 | ATGGAATCACCGTCGATTGG                  |
| <i>DGK4</i> R                                 | TCAATCTCCTTTGACGACCAA                 |
| <i>DGK4</i> H-L F                             | TTATGACATTGCT <u>T</u> TATAAAAAAGTTGG |
| <i>DGK4</i> H-L R                             | CAACTTTTTTATA <u>A</u> AGCAATGTCATAAA |
| <i>DGK4</i> Y-L F                             | ATCTACATAGCT <u>T</u> AGGAAGTGGAAGAA  |
| <i>DGK4</i> Y-L R                             | TCTTCCACTTCC <u>T</u> AAGCTATGTAGATT  |
| <b>Screening for homozygous</b>               |                                       |
| <b><i>dgk4-1</i> and <i>dgk4-2</i> plants</b> |                                       |
| <i>DGK4</i> promoter forward                  | TGTTTCTGACATCTGAGAACTTTT              |
| <i>DGK4</i> reverse                           | GATTGCATTCTTCGTAAAGACG                |
| <i>T-DNA</i>                                  | GTTACGTTAGTGGGCCATCG                  |
| <b>Expression of <i>DGK4</i></b>              |                                       |
| <i>DGK4</i> qPCR forward                      | CGTCGATTGGTGATTCATTG                  |
| <i>DGK4</i> qPCR reverse                      | TTGCAATGCCGAGATATTGA                  |
| <i>PP2AA3</i> qPCR forward                    | GCGGTTGTGGAGAACATGATACG               |
| <i>PP2AA3</i> qPCR reverse                    | GAACCAAACACAATTCGTTGCTG               |

153 Note: The underlined nucleotides incorporate the mutations changing histidine or  
 154 tyrosine residues at positions 350 and 379 to leucine.



155 **Movie S1. PT re-orientation responses of *Col-0* and *dgk4-1* to NO**

156 Movie file attached separately.

157

158

159 **Supplemental Experimental Procedures**

160

161 **PT growth *in planta***

162 PT growth in the pistil of hand pollinated WT and *dgk4-1* plants was examined by  
163 collecting the pistils at different time points (3 – 8 hours) after pollination. Aniline blue  
164 staining of PTs in the pistil was performed as described previously [7] and PT length in  
165 the pistil was measured using ImageJ [8].

166

167 **Protein expression and purification**

168 A Gateway compatible clone (DKLAT5G57690.1) containing the full-length coding  
169 sequence of *DGK4* was purchased from Arabidopsis Biological Resource Center  
170 (ABRC). The DGK4 sequence was recombined into the pDEST17 His-tagged  
171 expression vector and transformed into *E. coli BL21 A1* (Invitrogen, USA). Expression of  
172 recombinant DGK4 was induced with 0.2% (w/v) L-arabinose. Cells were lysed in a  
173 guanidium lysis buffer and the supernatant loaded onto a Ni-NTA agarose column for  
174 affinity purification under denaturing conditions using urea-containing buffers.

175 Denatured recombinant DGK4 was re-folded by gradual dilution of urea in a linear  
176 gradient using an AKTA FPLC (GE Healthcare, UK). Hemin (30 µg/mL) was added to  
177 the re-folding buffers to allow for incorporation of heme into DGK4 as it assumes native

178 conformation. Excess hemin was removed by size exclusion and recombinant DGK4  
179 stored in 'Buffer' containing 20 mM Na<sub>2</sub>H<sub>2</sub>PO<sub>4</sub>, 500 mM NaCl, 500 mM sucrose, 100  
180 mM non-detergent sulfobetaines (NDSB), 0.05% (w/v) polyethylene glycol (PEG), 4 mM  
181 reduced glutathione, 0.04 mM oxidized glutathione and SIGMAFAST protease inhibitor  
182 cocktail (1 tablet per 100 mL solution).

183 Two single dgk4 mutants (H350L and Y379L) were constructed using site directed  
184 mutagenesis by PCR [9]. To construct the H350L dgk4 mutant, two overlapping  
185 fragments of the DGK4 coding sequence both incorporating the mutation, were  
186 amplified from the pDEST17-DGK4 plasmid using the respective *DGK4* F and *DGK4* H-  
187 L R (for 1<sup>st</sup> fragment amplification), and *DGK4* H-L F and *DGK4* R (for 2<sup>nd</sup> fragment  
188 amplification) primer pairs (Table S2). The two overlapping fragments both incorporating  
189 the mutations were then used as templates for a PCR reaction using the full-length  
190 *DGK4* F and *DGK4* R primer pairs (Table S2) which generated a full-length dgk4 H350L  
191 mutant sequence. The dgk4 Y379L mutant was generated using the same method but  
192 with the following mutagenic primers pairs, *DGK4* F and *DGK4* Y-L R, and *DGK4* Y-L F  
193 and *DGK4* R (Table S2). The *DGK4* mutant PCR products were inserted into the  
194 PCR8/GW/TOPO vector (Invitrogen, USA) by TA cloning, recombined into the  
195 pDEST17 His-tagged expression vector and transformed into *E. coli* BL21 A1  
196 (Invitrogen, USA). Mutant dgk4 was expressed and affinity purified in the same manner  
197 as DGK4.

198

199

200

201 **Supplemental References**

202

- 203 1. Prado, A.M., Colaco, R., Moreno, N., Silva, A.C., and Feijo, J.A. (2008).  
204 Targeting of pollen tubes to ovules is dependent on nitric oxide (NO) signaling.  
205 *Mol. Plant* 1, 703-714.
- 206 2. Prado, A.M., Porterfield, D.M., and Feijo, J.A. (2004). Nitric oxide is involved in  
207 growth regulation and re-orientation of pollen tubes. *Development* 131, 2707-  
208 2714.
- 209 3. Meijering, E., Jacob, M., Sarria, J.C., Steiner, P., Hirling, H., and Unser, M.  
210 (2004). Design and validation of a tool for neurite tracing and analysis in  
211 fluorescence microscopy images. *Cytometry A* 58, 167-176.
- 212 4. Herzik, M.A., Jonnalagadda, R., Kuriyan, J., and Marletta, M.A. (2014). Structural  
213 insights into the role of iron–histidine bond cleavage in nitric oxide-induced  
214 activation of H-NOX gas sensor proteins. *Proc. Natl. Acad. Sci. U.S.A.* 111,  
215 E4156-E4164.
- 216 5. Alam, S., Yee, J., Couture, M., Takayama, S.J., Tseng, W.H., Mauk, A.G., and  
217 Rafferty, S. (2012). Cytochrome b5 from *Giardia lamblia*. *Metallomics* 4, 1255-  
218 1261.
- 219 6. Beltran, J., Kloss, B., Hosler, J.P., Geng, J., Liu, A., Modi, A., Dawson, J.H.,  
220 Sono, M., Shumskaya, M., Ampomah-Dwamena, C., *et al.* (2015). Control of  
221 carotenoid biosynthesis through a heme-based cis-trans isomerase. *Nat. Chem.*  
222 *Biol.* 11, 598-605.

- 223 7. Mori, T., Kuroiwa, H., Higashiyama, T., and Kuroiwa, T. (2006). GENERATIVE  
224 CELL SPECIFIC 1 is essential for angiosperm fertilization. *Nat. Cell Biol.* 8, 64-  
225 71.
- 226 8. Schneider, C.A., Rasband, W.S., and Eliceiri, K.W. (2012). NIH Image to ImageJ:  
227 25 years of image analysis. *Nat. Meth.* 9, 671-675.
- 228 9. Ho, S.N., Hunt, H.D., Horton, R.M., Pullen, J.K., and Pease, L.R. (1989). Site-  
229 directed mutagenesis by overlap extension using the polymerase chain reaction.  
230 *Gene* 77, 51-59.
- 231
